# Supplementary material
Source: PubMed Central journal article supplement (PMC2546798)
Supplement: supp_190_18_6170__1.pdf [file supp_190_18_6170__1.pdf]

Supplementary Table 1. Sequences of oligonucleotides used in this work.

| Sequence, 5' to 3'                                                 | Use                                                   |
|--------------------------------------------------------------------|-------------------------------------------------------|
| CAATATAAATGTATTTTTTCCCGATTTCCTTTTGAGGTTGATGTGTA<br>GGCTGGAGCTGCTTC | Amplification from pKD4 for <i>nsrR</i> disruption    |
| CGCGTATTTTTCAGCTTCGCGTTCCTGGAAAGGATCTTGTGACATAT<br>GAATATCCTCCTTAG | Amplification from pKD4 for <i>nsrR</i> disruption    |
| CTTTTTTCCTTCCCCGAAC                                                | Screening <i>nsrR</i> mutations                       |
| CACGTTTGGTTAAATGTT                                                 | Screening <i>nsrR</i> mutations                       |
| GAATTCCTGAAACCATGATTCTGCGC                                         | Amplification of Flag-tagged <i>nsrR</i> from JOEY135 |
| GGATCCTTACTATTTATCGTCGTCATCTTTGTAGTC                               | Amplification of Flag-tagged <i>nsrR</i> from JOEY135 |
| GCACGTTTTTCGCTCTGTGAA                                              | Amplification of <i>feaB</i> promoter                 |
| GGATCCTGCGGCTCTGTCATCACTTT                                         | Amplification of <i>feaB</i> promoter                 |
| CAGCACGGTGATTTTGTGCGA                                              | Amplification of <i>tynA</i> promoter                 |
| GGATCCGCTTCCCATTATTAACC                                            | Amplification of <i>tynA</i> promoter                 |
